# Supplementary material
Source: HighWire-hosted journal article supplement (https://jnm.snmjournals.org/highwire/filestream/95079/field_highwire_adjunct_files/0/170910_Supplemental_Data.pdf)
Supplement: 170910_Supplemental_Data.pdf [file 170910_Supplemental_Data.pdf]

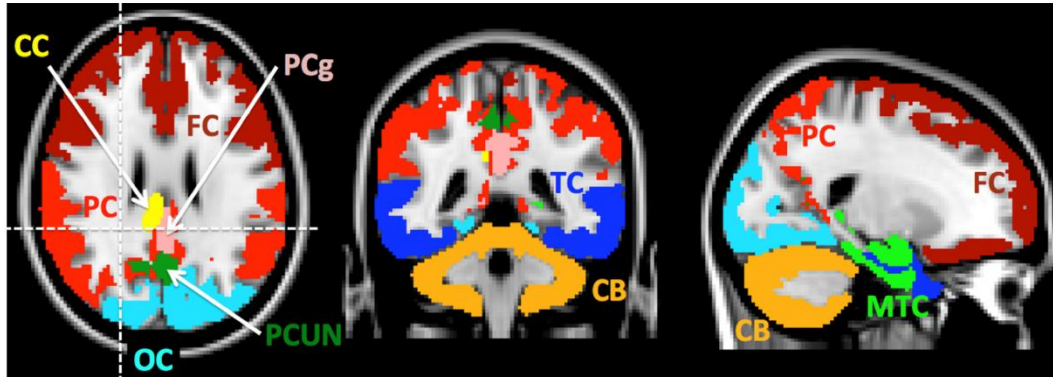

Supplemental Figure 1: Atlas-based regions of interest used in this work. Parietal cortex (PC), occipital cortex (OC), temporal cortex (TC), frontal cortex (FC), mesial temporal cortex (MTC), cerebellum (CB), and a subject specific region of interest located primarily in the corpus callosum (CC) are shown overlaid on the MNI152 MRI in standard space.

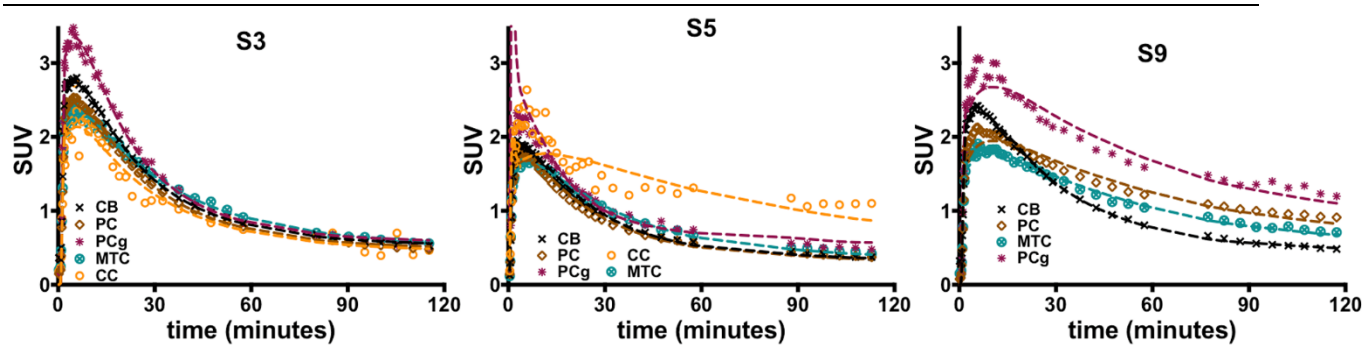

Supplemental Figure 2: Time activity curves and 1Tv (dashed lines) fits for a control subject S3, a subject with history of traumatic brain injury S5, and a MCI subject S9.

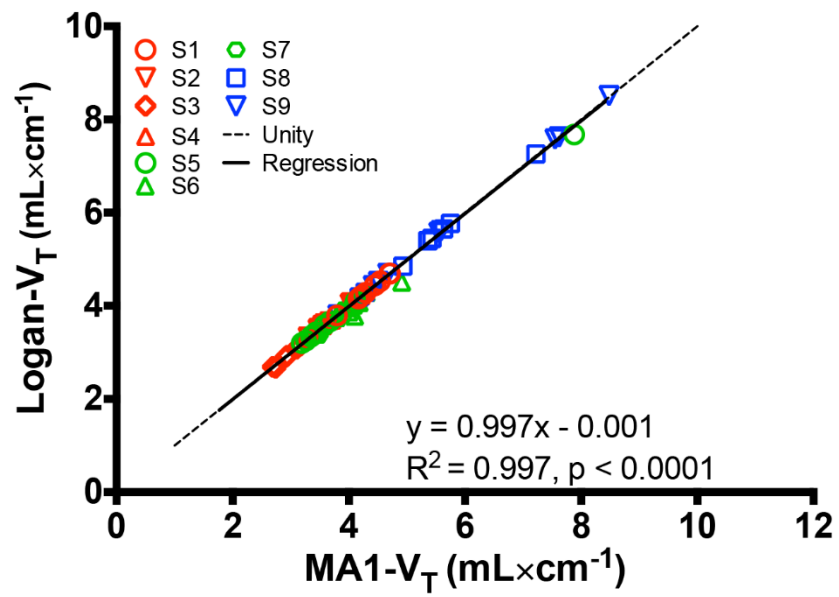

Supplemental Figure 3: Comparison of  $V_T$  calculated using MA1 or Logan.

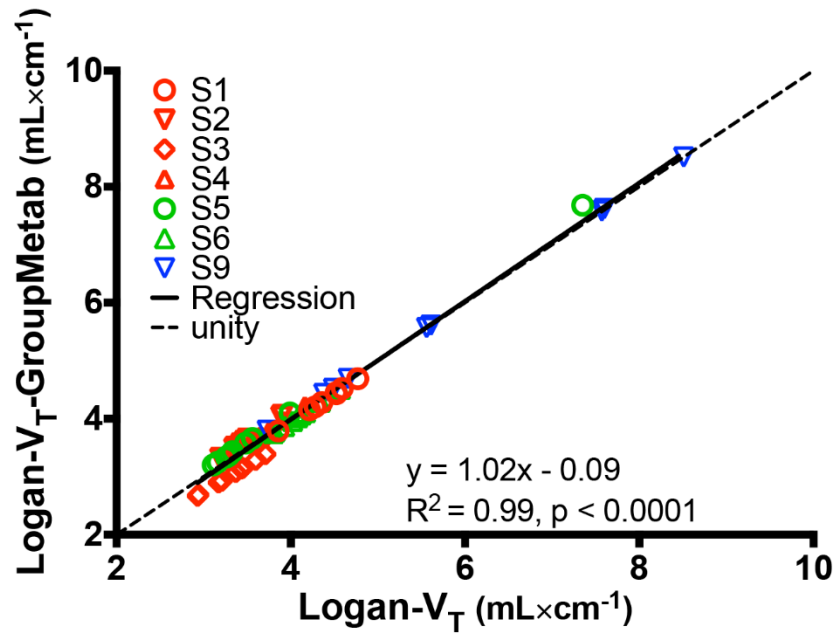

Supplemental Figure 4: Comparison of  $V_T$  calculated using Logan with either a subject specific metabolite correction or the group metabolite correction.

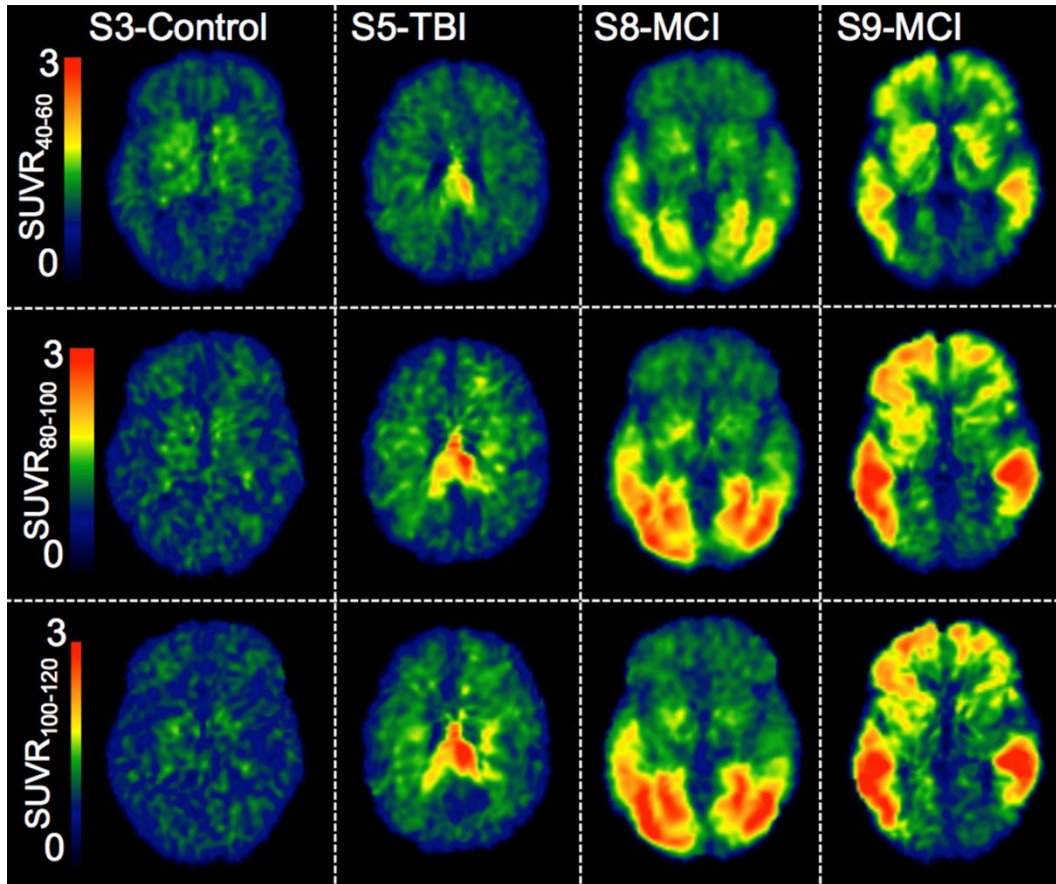

Supplemental Figure 5: SUVR images using data from 40-60 minutes (top), 80-100 minutes (middle), or 100-120 minutes (bottom).

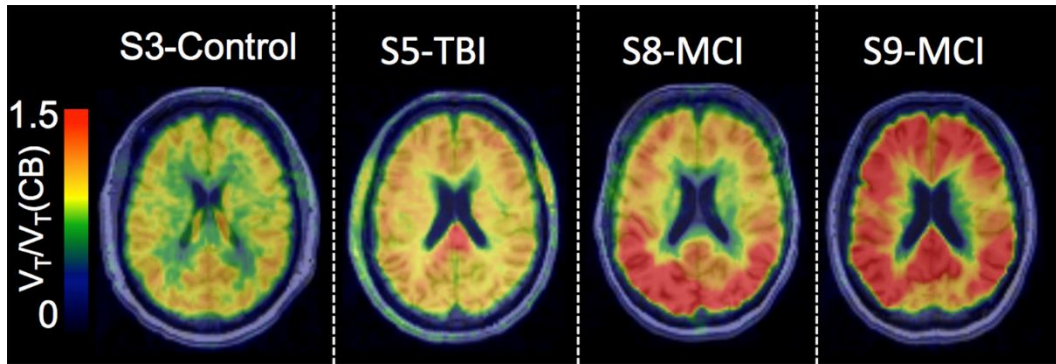

Supplemental Figure 6: 2Tv-DVR images with no brain masking highlighting the apparent lack of defluorination.

Supplemental Table 1: ROI information.

| ROI                                                                                                                                                     | Abbreviation | Volume (cm <sup>3</sup> ) |
|---------------------------------------------------------------------------------------------------------------------------------------------------------|--------------|---------------------------|
| Frontal cortex                                                                                                                                          | FC           | 293.0                     |
| Parietal cortex                                                                                                                                         | PC           | 183.3                     |
| Occipital cortex                                                                                                                                        | OC           | 124.2                     |
| Temporal cortex                                                                                                                                         | TC           | 173.1                     |
| Mesial temporal cortex <sup>A</sup>                                                                                                                     | MTC          | 19.6                      |
| Posterior cingulate gyrus                                                                                                                               | PCg          | 10.4                      |
| Precuneus                                                                                                                                               | PCUN         | 21.0                      |
| Cerebellum <sup>B</sup>                                                                                                                                 | CB           | 146.1                     |
| Corpus callosum <sup>C</sup>                                                                                                                            | CC           | 1.6                       |
| <sup>A</sup> included parts of the hippocampus, parahippocampal gyrus, and amygdala; <sup>B</sup> non vermis; <sup>C</sup> region of focal uptake in S5 |              |                           |

Supplemental Table 2: Regional 2Tv  $V_T$  estimates.

| Region | S1  | S2  | S3  | S4  | S5  | S6  | S7  | S8  | S9  |
|--------|-----|-----|-----|-----|-----|-----|-----|-----|-----|
| CB     | 4.5 | 3.6 | 3.3 | 4.2 | 3.7 | 4.6 | 4.5 | 4.6 | 4.0 |
| FC     | 4.0 | 3.9 | 2.8 | 4.1 | 3.4 | 3.9 | 3.7 | 5.0 | 5.2 |
| OC     | 4.8 | 3.9 | 3.3 | 4.4 | 3.7 | 4.4 | 3.7 | 9.4 | 4.8 |
| PC     | 4.5 | 4.0 | 3.1 | 4.2 | 3.5 | 4.2 | 4.0 | 6.6 | 6.3 |
| TC     | 4.6 | 4.0 | 3.1 | 4.1 | 3.9 | 4.4 | 3.8 | 6.8 | 6.4 |
| PCg    | 5.1 | 4.5 | 3.6 | 4.9 | 4.7 | 4.8 | 4.4 | 6.6 | 9.0 |
| PCUN   | 4.9 | 4.5 | 3.5 | 4.5 | 3.6 | 4.5 | 4.4 | 6.3 | 8.7 |
| CC     | 5.1 | 4.0 | 2.8 | 4.2 | 9.7 | 5.0 | 3.7 | 5.4 | 9.7 |
| MTC    | 4.7 | 3.9 | 3.4 | 4.3 | 4.1 | 4.1 | 4.5 | 6.6 | 5.0 |
